# Supplementary material for: Efficient DNA photocleavage by [Ru(bpy)2(dppn)]2+ with visible light
Source: Royal Society of Chemistry journal article supplement (doi:10.1039/b925574e), 2010-01-01
Supplement: b925574e.pdf [file b925574e.pdf]

## Supporting Information

### Efficient DNA photocleavage by $[\text{Ru}(\text{bpy})_2(\text{dppn})]^{2+}$ with visible light

Yujie Sun, Lauren E. Joyce, Nicole M. Dickson and Claudia Turro\*

*Department of Chemistry, The Ohio State University, Columbus, Ohio, 43210*

#### Synthesis and characterization

Dppn was synthesized according to a modified method.<sup>S1</sup> 1,10-Phenanthroline-5,6-dione (0.210 g) and 2,3-naphthalenediamine (0.158 g) were refluxed in 10 ml  $\text{CHCl}_3$  under  $\text{N}_2$  for 2 h. Dppn was precipitated by cooling the solution, was then filtered and washed with ether, and dried under vacuum. Yield: 0.211 g (64%).  $^1\text{H}$  NMR (400 MHz,  $\text{CDCl}_3$ )  $\delta$  (ppm): 9.63 (dd,  $J = 8.08, 1.75$  Hz, 1H), 9.24 (dd,  $J = 4.39, 1.62$  Hz, 1H), 8.93 (s, 1H), 8.19 (dd,  $J = 6.50, 3.27$  Hz, 1H), 7.77 (dd,  $J = 8.07, 4.46$  Hz, 1H), 7.62 (m, 1H).

$[\text{Ru}(\text{bpy})_2(\text{dppn})](\text{PF}_6)_2$ , **[3]** $(\text{PF}_6)_2$ , was synthesized by the direct coordination of dppn (0.020 g) to  $\text{Ru}(\text{bpy})_2\text{Cl}_2$  (0.028 g) in refluxing 15 ml ethylene glycol under  $\text{N}_2$  for 8 h. The cool mixture was filtered through Celite to remove free dppn ligand. An equal volume of a saturated  $\text{NH}_4\text{PF}_6$  solution was added to the filtrate to precipitate the red product, followed by filtration. The powder was washed with water and ether, and was dried under vacuum. Yield: 0.035 g (63%).  $^1\text{H}$  NMR (400 MHz,  $\text{CD}_3\text{CN}$ )  $\delta$  (ppm): 9.66 (dd,  $J = 8.20, 1.29$  Hz, 2H), 9.13 (s, 2H), 8.53 (dd,  $J = 11.30, 8.14$  Hz, 4H), 8.37 (dd,  $J = 6.54, 3.25$  Hz, 2H), 8.19-8.06 (m, 4H), 8.02 (dt,  $J = 8.07, 8.07, 1.45$  Hz, 2H), 7.93-7.81 (m, 4H), 7.80-7.72 (m, 4H), 7.46 (ddd,  $J = 7.57, 5.62, 1.29$  Hz, 2H), 7.28 (m, 2H). MALDI/MS,  $[\text{Ru}(\text{bpy})_2(\text{dppn})]^+$ , 746.327.

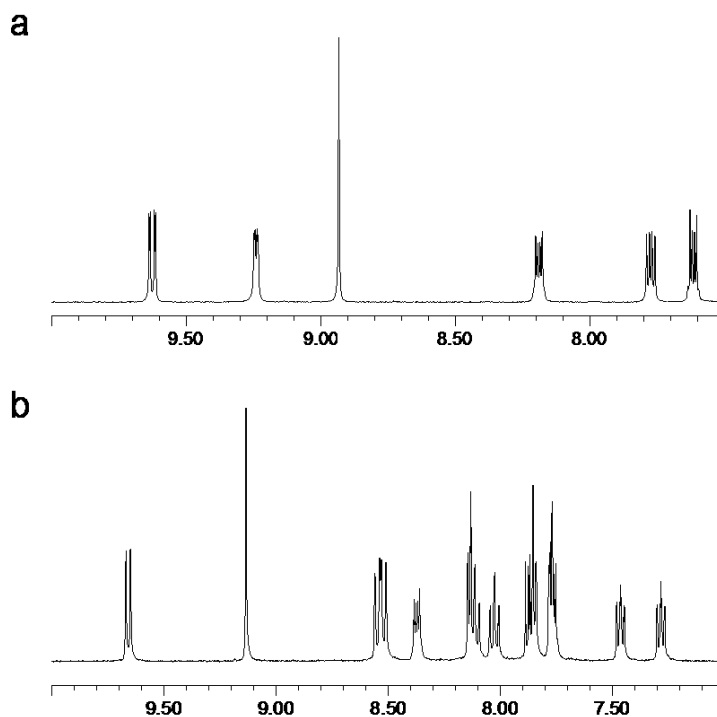

**Fig. S1**  $^1\text{H}$  NMR spectrum of (a) dppn in  $\text{CDCl}_3$  and (b) **[3]** $(\text{PF}_6)_2$  in  $\text{CD}_3\text{CN}$ .

$[\text{Ru}(\text{bpy})_3](\text{PF}_6)_2$  (**1**)( $\text{PF}_6$ )<sub>2</sub> and  $\text{Ru}(\text{bpy})_2(\text{dppz})(\text{PF}_6)_2$  (**2**)( $\text{PF}_6$ )<sub>2</sub> were synthesized by a similar method as that described  $[\text{Ru}(\text{bpy})_2(\text{dppn})](\text{PF}_6)_2$ . The chloride salts  $[\text{Ru}(\text{bpy})_2\text{L}]\text{Cl}_2$  (L = bpy, dppz, and dppn) were precipitated by the addition of a saturated  $\text{Bu}_4\text{NCl}$  acetone solution to the corresponding  $[\text{Ru}(\text{bpy})_2\text{L}](\text{PF}_6)_2$  complex in acetone. The solid was filtered, washed with acetone, diethyl ether, and dried under vacuum. Column chromatography using Sephadex G-15 solid phase was employed to obtain samples of high purity for luminescence studies.

## Electronic absorption and emission spectra

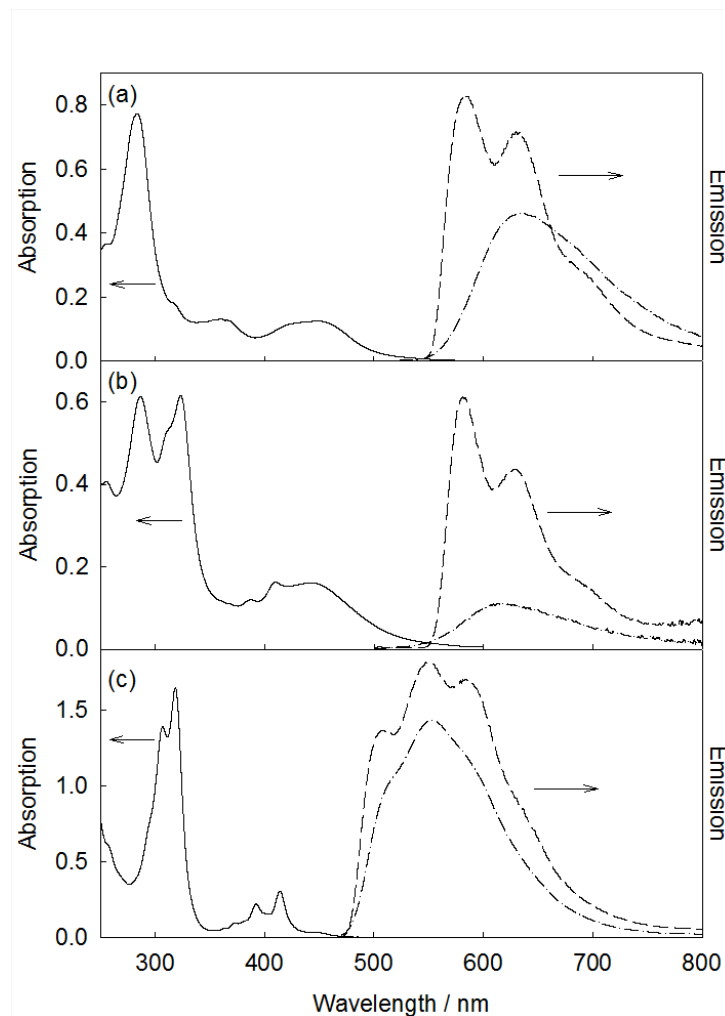

**Fig. S2** Absorption (solid) and emission spectra at room temperature (dotted-dash) and at 77 K (dash) in ethanol/methanol (v/v: 4/1) of (a) **2**( $\text{PF}_6$ )<sub>2</sub>, (b) **3**( $\text{PF}_6$ )<sub>2</sub>, and (c) dppn. The room temperature absorption spectra of **2** and **3** were obtained in  $\text{CH}_3\text{CN}$ , and that of dppn was in  $\text{CHCl}_3$ .

### $^1\text{H}$ NMR spectra as a function of concentration

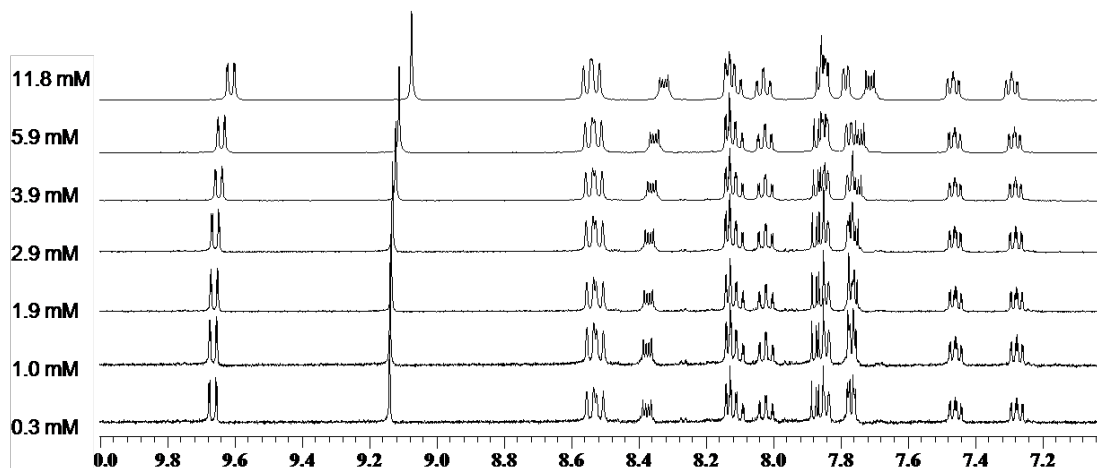

**Fig. S3**  $^1\text{H}$  NMR spectra of  $[\mathbf{3}](\text{PF}_6)_2$  in  $\text{CD}_3\text{CN}$  as function of its concentration.

### Nanosecond - microsecond transient absorption spectra

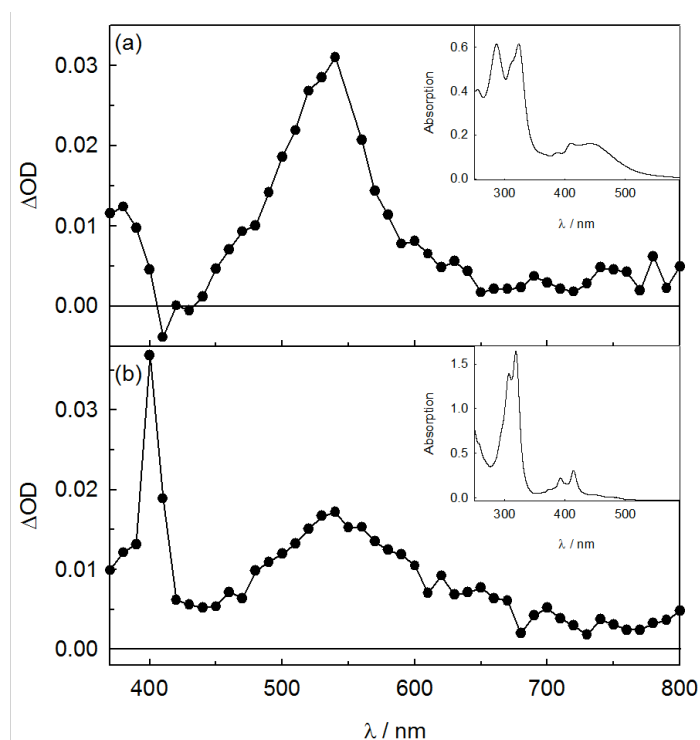

**Fig. S4** Transient absorption spectra of (a)  $[\mathbf{3}](\text{PF}_6)_2$  (43  $\mu\text{M}$ ) in deaerated  $\text{CH}_3\text{CN}$  collected at 0.6  $\mu\text{s}$  and (b) dppn (25  $\mu\text{M}$ ) in deaerated  $\text{CHCl}_3$  collected at 0.6  $\mu\text{s}$  after the laser pulse ( $\lambda_{\text{ex}} = 355$  nm, fwhm  $\sim 8$  ns). Insets: corresponding ground state absorption spectra.

## Ultrafast data for 2

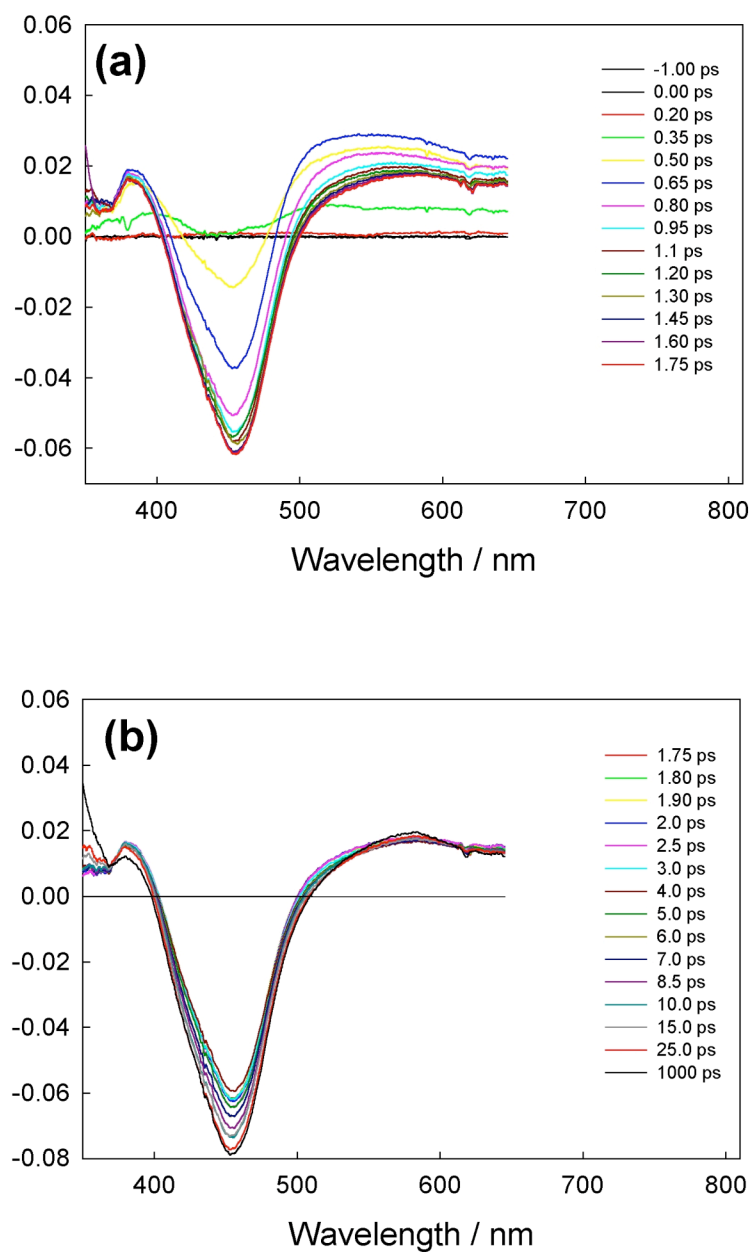

**Fig. S5** Transient absorption spectra of 73  $\mu\text{M}$   $[2](\text{PF}_6)_2$  in  $\text{CH}_3\text{CN}$  collected (a) 0 - 1.75 ps and (b) 1.75 to 1000 ps after excitation pulse ( $\lambda_{\text{exc}} = 290$  nm, fwhm = 300 ps).

### Relative viscosity plot

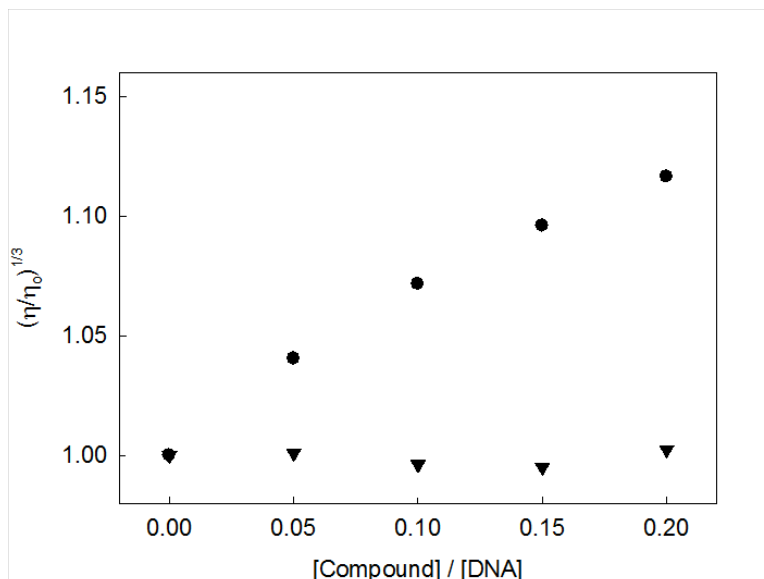

**Fig. S6** Relative viscosity plot of  $(\eta/\eta_0)^{1/3}$  vs  $[\text{Compound}]/[\text{DNA}]$  for complexes  $[1]\text{Cl}_2$  (▼) and  $[3]\text{Cl}_2$  (●) at  $24 \pm 1$  °C in 5 mM Tris (50 mM NaCl, pH = 7.5).

### Wavelength dependence of irradiation light for DNA photocleavage by 3

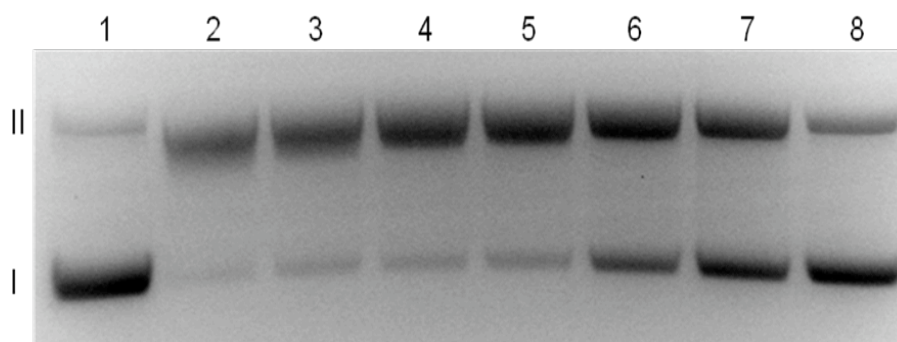

**Fig. S7** Ethidium bromide stained agarose gel of the photocleavage of 100 μM pUC18 plasmid by 20 μM  $[3]\text{Cl}_2$  in air ( $t_{\text{irr}} = 5$  min, 5 mM Tris, pH = 7.5, 50 mM NaCl) at various irradiation wavelengths: lane 1, dark; lane 2,  $\lambda \geq 475$  nm; lane 3,  $\lambda \geq 495$  nm; lane 4,  $\lambda \geq 515$  nm; lane 5,  $\lambda \geq 530$  nm; lane 6,  $\lambda \geq 550$  nm; lane 7,  $\lambda \geq 570$  nm; lane 8,  $\lambda \geq 590$  nm.

## Emission quenching by GMP

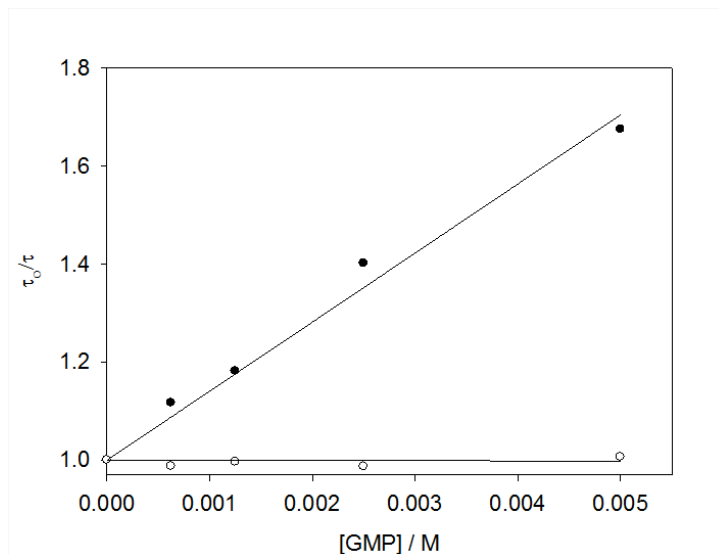

**Fig. S8** Stern-Volmer plot obtained from the luminescence lifetimes of 20  $\mu$ M  $[1]Cl_2$  (○) and 20  $\mu$ M  $[3]Cl_2$  (●) with addition of GMP in deaerated 50 mM Tris buffer (50 mM NaCl, pH = 7.5).

---

## References

- S1 Z. B. Zhang, W. P. Yan and M. G. Fan, *Chin. J. App. Chem.*, 2005, **22**, 103-104.
